# More Tweets, More Votes: Social Media as a Quantitative Indicator of Political Behavior

Joseph DiGrazia<sup>1\*</sup>, Karissa McKelvey<sup>2</sup>, Johan Bollen<sup>2</sup>, Fabio Rojas<sup>1</sup>

**1** Department of Sociology, Indiana University, Bloomington, Indiana, United States of America, **2** School of Informatics and Computing, Indiana University, Bloomington, Indiana, United States of America

## Abstract

Is social media a valid indicator of political behavior? There is considerable debate about the validity of data extracted from social media for studying offline behavior. To address this issue, we show that there is a statistically significant association between tweets that mention a candidate for the U.S. House of Representatives and his or her subsequent electoral performance. We demonstrate this result with an analysis of 542,969 tweets mentioning candidates selected from a random sample of 3,570,054,618, as well as Federal Election Commission data from 795 competitive races in the 2010 and 2012 U.S. congressional elections. This finding persists even when controlling for incumbency, district partisanship, media coverage of the race, time, and demographic variables such as the district's racial and gender composition. Our findings show that reliable data about political behavior can be extracted from social media.

**Citation:** DiGrazia J, McKelvey K, Bollen J, Rojas F (2013) More Tweets, More Votes: Social Media as a Quantitative Indicator of Political Behavior. *PLoS ONE* 8(11): e79449. doi:10.1371/journal.pone.0079449

**Editor:** Luis M. Martinez, CSIC-Univ Miguel Hernandez, Spain

**Received:** April 18, 2013; **Accepted:** September 22, 2013; **Published:** November 27, 2013

**Copyright:** © 2013 DiGrazia et al. This is an open-access article distributed under the terms of the Creative Commons Attribution License, which permits unrestricted use, distribution, and reproduction in any medium, provided the original author and source are credited.

**Funding:** The authors gratefully acknowledge support from the National Science Foundation (grants SBE 0914939 and CCF 1101743) and the McDonnell Foundation (grant 2011022). The funders' websites can be accessed at <http://nsf.gov> and <http://jsmf.org>, respectively. The funders had no role in study design, data collection and analysis, decision to publish, or preparation of the manuscript.

**Competing Interests:** Co-author on this paper, Johan Bollen, is a PLOS ONE Editorial Board member. This does not alter the authors' adherence to all the PLOS ONE policies on sharing data and materials.

\* E-mail: [jdigrazi@indiana.edu](mailto:jdigrazi@indiana.edu)

## Introduction

An increasingly important question for researchers in a variety of fields is whether social media activity can be used to assess offline political behavior. Online social networking environments present a tremendous scientific opportunity: they generate large-scale data about the communication patterns and preferences of hundreds of millions of individuals [1], which can be analyzed to form sophisticated models of individual and group behavior [2,3]. However, some researchers have questioned the validity of such data, pointing out that social media content is largely focused on entertainment and emotional expression [4,5], potentially rendering it a poor measure of the behaviors and outcomes typically of interest to social scientists.

Additionally, social media provide a self-selected sample of the electorate. A study by Mislove et al. investigates this bias on the county level, finding that Twitter data do not accurately represent the sociodemographic makeup of the United States [6]. Furthermore, right-leaning political communication channels, such as #tcot ("Top Conservatives on Twitter"), are more active and densely connected than left-leaning channels [7]. Hargittai's work has been extremely influential in investigating gender, income, age, and other social factors that create systematic differences in Internet use, including Twitter [8–10]. Researchers have also found that extraversion and openness to experiences are positively related to social media use, while emotional stability has a negative relationship [11]. Taken together, these studies suggest that social media provide a biased, non-representative sample of the population.

Despite these issues, a growing literature suggests that online communication can still be a valid indicator of offline behavior. For example, film title mentions correlate with box office revenue [12], and online expressions of public mood correlate with fluctuations in stock market prices, sleep, work, and happiness [13–15]. In addition, a number of studies have examined the relationship between online activity and election outcomes [16–19]. However, many of these studies have been criticized for a variety of reasons, including: using a self-selected and biased sample of the population; investigating only a small number of elections; or not using sociodemographic controls [20,21]. Tumasjan analyzed the relationship between tweets and votes in the 2009 German election [18], but these results have been criticized because they depend upon arbitrary choices made by the authors in their analysis [22].

Here, we provide a systematic link between social media data and real-world political behavior. Over two U.S. congressional election cycles, we show a statistically significant relationship between tweets and electoral outcomes that persists after accounting for an array of potentially confounding variables, including incumbency, baseline district partisanship, conventional media coverage and the sociodemographics of each district. These results do not rely on any knowledge of the physical location of these users at the time of their post or their emotional valence. These results indicate that the "buzz" or public discussion about a candidate on social media can be used as an indicator of voter behavior.

## Materials and Methods

### Data

To model the relationship between social media content and political behavior in a manner that overcomes the limitations of previous work, we compiled a congressional district-level dataset with data from Twitter, the Federal Election Commission, and the U.S. Census Bureau. First, we retrieved a random sample of 547,231,508 tweets posted between August 1 and November 1, 2010 and 3,032,823,110 posted between August 1 and November 5, 2012. We collected this data using the Twitter “Gardenhose” streaming API (<https://dev.twitter.com/docs/api/1.1/get/statuses/sample>), which provides a random sample of approximately 10% of the entire Twitter stream. Data on tweets collected through the API include useful metadata, including a unique tweet identifier, the content of the tweet, a timestamp, and the username of the account that produced the tweet. Of this random sample, we extracted 113,985 tweets in 2010 and 428,984 in 2012 that contained the name of the Republican or Democratic candidate for Congress from each district. We have released this district-level data online (<http://dx.doi.org/10.7910/DVN/23103>).

Next, we collected data on election outcomes from the 2010 and 2012 U.S. congressional elections from the Federal Election Commission. Additionally, for 2010, we collected socio-demographic and electoral control variables commonly used in other research on electoral politics for all 435 U.S. House districts [23,24]. These include measures of Republican incumbency, district partisanship, median age, percent white, percent college educated, median household income and percent female [25–27]. Incumbency is coded as 1 if the Republican candidate is an incumbent and 0 otherwise. District partisanship is measured by the percentage of the 2008 presidential vote captured by Republican candidate John McCain. The inclusion of controls is necessary to ensure that the effect of Twitter is robust and not spurious. For example, it is possible that an observed relationship between Twitter mentions and vote counts is simply due to the tendency of Twitter users to discuss incumbents, who have a high probability of winning, more than they discuss non-incumbents. Equivalent data about the sociodemographic profile of congressional districts is not yet available for the 2012 House districts due to redistricting after the 2010 elections.

To control for the extent to which a candidate is covered in the traditional media, we have included a measure of how frequently a candidate is mentioned in transcripts of broadcasts on the cable news network CNN during the same time period. The CNN variable consists of the share of CNN transcripts that mention the Republican candidate. For each district,  $i$ , the CNN share variable,  $CNN_S(i)$ , is defined as  $CNN_R(i)/(CNN_R(i)+CNN_D(i))$  where  $CNN_R(i)$  represents the number of transcripts mentioning the Republican candidate and  $CNN_D(i)$  represents the number of transcripts mentioning the Democratic candidate.

### Variable Definitions

Our independent variables are constructed from the number of tweets that contained the candidate’s name (e.g. “Nancy Pelosi”). In the formula below,  $tw_S(i)$  represents the percentage of Twitter attention given to a particular candidate over his or her opponent in a particular race. Each district  $i$  is assigned its share of Republican tweets from the total of both Democratic and Republican frequencies, denoted  $tw_D(i)$  and  $tw_R(i)$  respectively.

$$tw_S(i) = \frac{tw_R(i)}{tw_D(i) + tw_R(i)} \times 100 \quad (1)$$

We construct a similar Twitter share variable to account for the number of users with at least one tweet about a candidate. This totaled 28,193 users in 2010 and 166,978 users in 2012, though the 2012 value is inflated somewhat by vice-presidential candidate, Paul Ryan. We hypothesize this may help account for the potential bias that could be created by a small number of extremely committed users or automated accounts generating large numbers of tweets about a candidate. Tweet share and user share each range from 0 to 100 with tweet share having a median of 50.24 in 2010 and 54.05 in 2012 and user share having a 2010 median of 50.

Our dependent variable consists of the Republican vote share for each district  $i$ , denoted  $v_S(i)$  defined as the share of votes received by the Republican candidate, denoted  $v_R(i)$ , and the Democratic candidate, denoted  $v_D(i)$ .

$$v_S(i) = \frac{v_R(i)}{v_D(i) + v_R(i)} \times 100 \quad (2)$$

### Analysis

We estimate the effect of Twitter activity on electoral outcomes using three ordinary least squares regression (OLS) models. We did not use data from 29 districts in 2010 and 46 districts in 2012 where there was no opposition from a major party candidate. For the 2010 data, we estimate bivariate models and full models, which include the aforementioned control variables, for both tweet and user share. For 2012, we only estimate the effect of tweet share on electoral outcomes in a bivariate model, as control variables are not available at the time of publication.

### Results

Tables 1 and 2 report results from the data from the 2010 election. The coefficients for both the tweet and user share show statistically significant effects ( $p < .05$ ). The 2010 bivariate relationship is shown in Figure 1. As shown in Table 1, each percentage point increase in 2010 tweet share is associated with an increase in the vote share of .268 in the bivariate model. Although the effect size is reduced to .022 in the full model, the effect remains highly significant. Both the bivariate and full models fit the data well; the  $R^2_{adj}$  for the bivariate model is .26 and increases to .92 in the full model. The effect for user share is .279 in the bivariate model and .027 in the full model, indicating that, net of all other factors, each additional percentage point increase in user share is associated with an increase of .027 in the Republican vote share. The effect of user share is also significant, indicating that this relationship is not driven by a small number of users. Like the tweet share models, both the bivariate and full user share models fit the data well with  $R^2_{adj}$  values of .28 and .92, respectively.

To give a better sense of the magnitude of the effects, an increase of one standard deviation in tweet share in the full model is associated with an increase in the vote share equal to .708. An increase of one standard deviation in user share is associated with an increase of .874 in vote share in the full model. While these effects are much smaller than the effects of the Twitter measures in the bivariate model, modest increases in the tweet share measures

**Table 1.** Results for Regression of Republican Vote Share on Tweet Share with Controls.

| Variable                      | Bivariate (SE)   | Full Model (SE) |
|-------------------------------|------------------|-----------------|
| Republican Tweet Share        | 0.268 (0.022)*** | 0.022 (0.01)*   |
| Republican Incumbent          |                  | 11.06 (0.66)*** |
| % McCain                      |                  | 0.776 (0.03)*** |
| Median Age                    |                  | 0.012 (0.09)    |
| % White                       |                  | 0.129 (0.02)*** |
| % College Educated            |                  | -0.004 (0.05)   |
| Median HH Income              |                  | 0.016 (0.03)    |
| % Female                      |                  | 0.089 (0.30)    |
| CNN share                     |                  | 0.002 (0.01)    |
| Const                         | 37.042 (1.35)    | -4.07 (15.04)   |
| N                             | 406              | 406             |
| R <sup>2</sup> <sub>adj</sub> | .26              | .92             |

Explaining Republican vote share with the proportion of tweets that included a Republican candidate during the three months before the 2010 election. The share of Republican tweets remains significant after adding controls. Standard error (SE) is in parentheses.

\*(p < .05).  
 \*\* (p < .01).  
 \*\*\* (p < .001).

doi:10.1371/journal.pone.0079449.t001

**Table 2.** Results for Regression of Republican Vote share on User Share with Controls.

| Variable                      | Bivariate (SE)  | Full Model (SE)  |
|-------------------------------|-----------------|------------------|
| Republican User Share         | 0.279 (0.02)*** | 0.027 (0.01)**   |
| Republican Incumbent          |                 | 10.956 (0.65)*** |
| % McCain                      |                 | 0.772 (0.03)***  |
| Median Age                    |                 | 0.010 (0.09)     |
| % White                       |                 | 0.131 (0.02)***  |
| % College Educated            |                 | -0.005 (0.05)    |
| Median HH Income              |                 | 0.017 (0.03)     |
| % Female                      |                 | 0.117 (0.30)     |
| CNN share                     |                 | 0.001 (0.01)     |
| Const                         | 36.423 (1.32)   | -5.474 (15.01)   |
| N                             | 406             | 406              |
| R <sup>2</sup> <sub>adj</sub> | .28             | .92              |

Explaining Republican vote share with the proportion of users who included a Republican candidate in at least one tweet during the three months before the 2010 election. The relationship remains significant after adding controls. Standard error (SE) is in parentheses.

\*(p < .05).  
 \*\* (p < .01).  
 \*\*\* (p < .001).

doi:10.1371/journal.pone.0079449.t002

still produce substantively meaningful and highly significant predicted changes in the vote share.

There are also a number of significant effects for some of the other control variables that are worth noting. Consistent with previous research, Republican incumbency and baseline district partisanship, as measured by McCain vote share, have highly significant effects in both models [23,24]. Interestingly, the percentage of whites also has a highly significant positive effect on vote share, even controlling for McCain vote share. This may indicate that voting in this election was particularly racialized even compared to the 2008 contest.

We can assess the limitations of this model by looking at outliers. We examine those congressional districts where the residual was at least two standard deviations above or below the predicted value. We find that districts where the model under-performs tend to be relatively noncompetitive. If there is little doubt about who the winner will be, there may be little reason to talk about the election. In the baseline model, for example, we obtain outliers such as California's 5th Congressional District and West Virginia 2nd Congressional District. These areas lean heavily Democratic. California's 5th has voted Democrat since 1949. Since 2000, every Democrat polled at least 70%, with the exception of a 2005 special election, where the winning Democrat won with 67% of the vote. Similarly, West Virginia's 2nd shows a strong partisan orientation. A single Republican has held the seat since 2001. However, a lack of competition does not explain every outlier. Some districts have idiosyncratic features that merit more research. For example, Oklahoma's 2nd Congressional District is a rural area that has voted for a Democratic Congressman while voting strongly for McCain and Bush.

The analysis of the 2012 U.S. House elections yields similar bivariate results. The bivariate relationship between tweet and vote share is shown in Figure 2 for 2012. Data from 389 districts with competitive races yields a bi-variate OLS regression coefficient of .288 (p < .01). We observe an analogous effect, with

very similar coefficients in the bivariate models across the two election cycles.

Finally, we test the robustness of the results by examining the model across different time periods before the election. Because the link between tweets and voter preferences may vary during the period before the election, we estimate the same models using only monthly shares of Twitter data from August, September, and October. As shown in Figure 3, the effect of Twitter share is

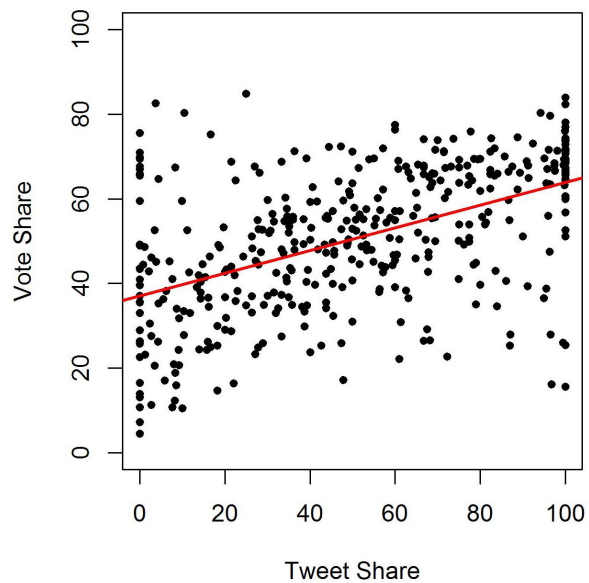

**Figure 1. 2010 Republican Tweet Share vs. Vote Share.** Bivariate relationship between the share of occurrences of Republican names in tweets and vote share in the 2010 congressional elections. We show a significant positive relationship.  
 doi:10.1371/journal.pone.0079449.g001

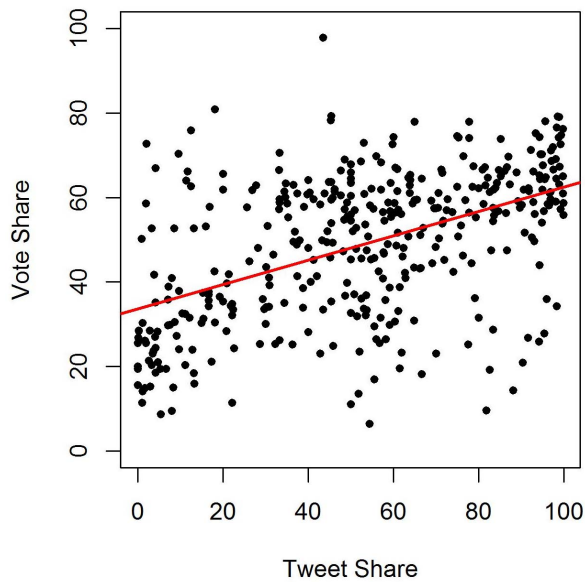

**Figure 2. 2012 Republican Tweet Share vs. Vote Share.** Bivariate relationship between the share of occurrences of Republican names in tweets and vote share in the 2012 congressional elections. We show a significant positive relationship. doi:10.1371/journal.pone.0079449.g002

similar in magnitude across all three months as indicated by their overlapping confidence intervals.

## Discussion

These findings indicate that the amount of attention received by a candidate on Twitter, relative to his or her opponent, is a statistically significant indicator of vote share in 795 elections during two full election cycles. Note that this is found in a random sample of all tweets during the first three months before the two election cycles, despite the fact that Twitter has been well-studied as a biased sample of the general population [6]. Our analysis does not require information about the physical location of Twitter users. Further research can investigate why geographical information about users is not needed. Furthermore, we find that social media are a better indicator of political behavior than traditional television media, such as CNN, which many scholars have argued is important because it shapes political reality via agenda setting [28,29].

The effect of Twitter holds even without accounting for the sentiment of the tweet – in other words, it holds regardless of whether or not the tweet is positive or negative (e.g., “I love Nancy Pelosi,” “Nancy Pelosi should be impeached”). One possible explanation draws on previous research in psycho-linguistics, which has found that people are more likely to say a word when it has a positive connotation in their mind [30–32]. Known as the Pollyanna hypothesis, this finding implies that the relative over-representation of a word within a corpus of text may indicate that it signifies something that is viewed in a relatively positive manner. Another possible explanation might be that strong candidates attract more attention from both supporters and opponents. Specifically, individuals may be more likely to attack or discuss disliked candidates who are perceived as being strong or as having a high likelihood of winning.

The findings also suggest that social media data could be developed into measures of public attitudes and behaviors that

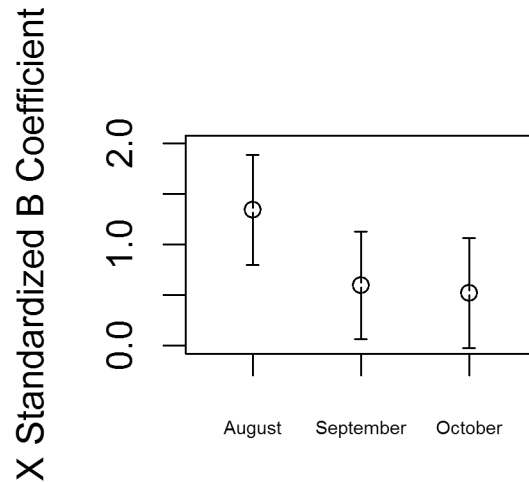

**Figure 3. Effects of Name Share Mention by Month.** Effects of Republican tweet share during the months of August, September, and October with a 95% confidence interval. doi:10.1371/journal.pone.0079449.g003

could serve as alternatives to polling data. While polling data remains extremely useful, and has seen increased public interest with the rise of popular polling analysts like Nate Silver, alternate data sources can serve as an important supplement to traditional voter surveys. This is particularly true in cases like U.S. House races, where large amounts of traditional polling data are typically not available. Social media data has other distinct advantages, including the fact that, because social media data is constantly created in real time, data about particular events or time periods can be collected after the fact. Additionally, social media data is less likely to be affected by social desirability bias than polling data [33]. That is, a person who participates in a poll may not express opinions perceived to be embarrassing or offensive. For example, few survey respondents will admit that they may not vote for a candidate because he is Black (e.g., Barack Obama) or a Mormon (e.g., Mitt Romney). The potential of social media and Internet data for capturing these socially undesirable sentiments was demonstrated in recent research on Google searches which showed that the frequency of searches for racial slurs is correlated with a lower vote count for Obama in 2008 relative to Kerry in 2004 [34]. This finding would not be possible with a traditional poll.

Finally, this study adds to the mounting evidence that online social networks are not ephemeral, spam-ridden sources of information. Rather, social media activity provides a valid indicator of political decision making.

## Acknowledgments

We would like to thank Michael Conover, Jacob Ratkiewicz, Mark Meiss, and other current and past members of the Truthy group at Indiana University (cnets.indiana.edu/groups/nan/truthy) for their contributions to the Truthy Project. We would also like to thank Emily Winters and Matt Stephens for data collection as well as Clem Brooks, Elizabeth Pisares, Année Tousseau and the Politics, Economy, and Culture Workshop at Indiana University for helpful discussions and contributions.

## Author Contributions

Analyzed the data: JD KM FR. Wrote the paper: JD KM JB FR. Collected the data: JD KM.

## References

1. Bainbridge W (2007) The scientific research potential of virtual worlds. *Science* 317: 4726.
2. Lazer D, Pentland A, Adamic L, Aral S, Barabasi AL, et al. (2009) Social science. computational social science. *Science* 323: 7213.
3. Vespignani A (2009) Predicting the behavior of techno-social systems. *Science* 325: 4258.
4. Naaman M, Boase J, Lai CH (2010) Is it really about me?: message content in social awareness streams. In: Proceedings of the 2010 ACM conference on Computer supported cooperative work. New York, NY, USA: ACM, CSCW '10, pp. 189–192. doi:10.1145/1718918.1718953.
5. Java A, Song X, Finin T, Tseng B (2007) Why we twitter: understanding microblogging usage and communities. In: Proceedings of the 9th WebKDD and 1st SNA-KDD 2007 workshop on Web mining and social network analysis. ACM, pp. 56–65.
6. Mislove A, Lehmann S, Ahn YY, Onnela JP, Rosenquist JN (2011) Understanding the demographics of twitter users. In: ICWSM '11: 5th International AAAI Conference on Weblogs and Social Media. Barcelona, Spain, pp. 554–557.
7. Conover MD, Gonc B, Flammini A, Menczer F (2012) Partisan asymmetries in online political activity. *EPJ Data Science* 1: 1–17.
8. Hargittai E, Litt E (2012) Becoming a tweep: How prior online experiences influence twitter use. *Information, Communication & Society* 15: 680–702.
9. Hargittai E, Shafer S (2006) Differences in actual and perceived online skills: the role of gender\*. *Social Science Quarterly* 87: 432–448.
10. Hargittai E (2007) Whose space? differences among users and non-users of social network sites. *Journal of Computer-Mediated Communication* 13: 276–297.
11. Correa T, Hinsley AW, Gil de Zúñiga H (2010) Who interacts on the web?: The intersection of users personality and social media use. *Computers in Human Behavior* 26.
12. Asur S, Huberman BA (2010) Predicting the future with social media. In: Proceedings of the 2010 IEEE/WIC/ACM International Conference on Web Intelligence and Intelligent Agent Technology - Volume 01. Washington, DC, USA: IEEE Computer Society, WI-IAT '10, pp. 492–499. doi: 10.1109/WI-IAT.2010.63.
13. Bollen J, Mao H, Zeng X (2011) Twitter mood predicts the stock market. *Journal of Computational Science* 2: 1–8.
14. Golder S, Macy M (2011) Diurnal and seasonal mood vary with work, sleep, and daylength across diverse cultures. *Science* 333: 187881.
15. Dodds P, Harris K, Kloumann I, Bliss C, Danforth C (2010) Temporal patterns of happiness and information in a global social network: hedonometrics and twitter. *PloS one* 6: e26752.
16. Jensen MJ, Anstead N (2013) Psephological investigations: Tweets, votes, and unknown unknowns in the republican nomination process. *Policy & Internet* 5: 161–182.
17. Livne A, Simmons MP, Gong WA (2011) Networks and language in the 2010 election. In: *Political Networks 2011*.
18. Tumasjan A, Sprenger TO, Sandner PG, Welpe IM (2010) Predicting elections with twitter : What 140 characters reveal about political sentiment. *Word Journal Of The International Linguistic Association* 280: 178–185.
19. O'Connor B, Balasubramanyan R, Routledge BR, Smith NA (2010) From tweets to polls: Linking text sentiment to public opinion time series. In: Proceedings of the International AAAI Conference on Weblogs and Social Media. AAAI Press, volume 5, p. 122129.
20. Gayo-avello D (2012) I wanted to predict elections with twitter and all i got was this lousy paper a balanced survey on election prediction using twitter data. Arxiv preprint arXiv12046441 : 1–13.
21. Metaxas PT, Mustafaraj E, Gayo-Avello D (2011) How (not) to predict elections. In: Privacy, security, risk and trust (PASSAT), 2011 IEEE third international conference on and 2011 IEEE third international conference on social computing (SocialCom). IEEE, pp. 165–171.
22. Jungherr A, Jurgens P, Schoen H (2012) Why the pirate party won the german election of 2009 or the trouble with predictions: A response to tumasjan, a., sprenger, to, sander, pg, & welpe, im predicting elections with twitter: What 140 characters reveal about political sentiment. *Social Science Computer Review* 30: 229–234.
23. Klarner C (2008) Forecasting the 2008 us house, senate and presidential elections at the district and state level. *PS: Political Science & Politics* 41: 723728.
24. Abramowitz AI (1975) Name familiarity, reputation, and the incumbency effect in a congressional election. *The Western Political Quarterly* 28.
25. Brady H, Verba S, Schlozman K (1995) Beyond ses: A resource model of political participation. *American Political Science Review* : 271–294.
26. Schlozman K, Burns N, Verba S (1994) Gender and the pathways to participation: The role of resources. *Journal of Politics* 56: 963–990.
27. Verba S, Schlozman K, Brady H, Nie N (1993) Race, ethnicity and political resources: participation in the united states. *British Journal of Political Science* 23: 453–497.
28. McCombs ME, Shaw DL (1972) The agenda-setting function of mass media. *Public Opinion Quarterly* 36: 176–187.
29. Roberts MS (1992) Predicting voting behavior via the agenda-setting tradition. *Journalism and Mass Communication Quarterly* 69: 878–892.
30. Boucher J, Osgood CE (1969) The pollyanna hypothesis. *Journal of Verbal Learning and Verbal Behavior* 8.
31. Garcia D, Garas A, Schweitzer F (2012) Positive words carry less information than negative words. *EPJ Data Science* 1: 1–12.
32. Rozin P, Berman L, Royzman E (2010) Biases in use of positive and negative words across twenty natural languages. *Cognition & Emotion* 24.
33. Fisher RJ (1993) Social desirability bias and the validity of indirect questioning. *Journal of Consumer Research* : 303–315.
34. Stephens-Davidowitz S (2013) The cost of racial animus on a black presidential candidate: Using google search data to find what surveys miss.
